# Supplementary material
Source: publisher site journal article supplement (https://www.spandidos-publications.com/2750/downloadSupplementary)
Supplement: Supplementary file 1 [file downloadSupplementary]

### **Preliminary experiment of the *in vitro* silicosis cell model establishment**

NR8383 cells in the logarithmic phase were cultured in the Ham'S F12K complete medium for single-cell suspension. Following the cell counting assay, the NR8383 cell suspension was inoculated into a 96-well plate at the density of  $5 \times 10^3/100 \mu\text{l}$  (100  $\mu\text{l}$  per well), then transferred into an incubator in the condition of 5%  $\text{CO}_2$  and  $37^\circ\text{C}$  for 24 h. To identify the optimal dose of  $\text{SiO}_2$  exposure for the *in vitro* silicosis cell model establishment, NR8383 cells in the plate were treated with silica suspension of different concentrations and incubated at  $37^\circ\text{C}$  for another 12 h (5, 10, 20, 40 and  $80 \mu\text{g}/\text{cm}^2$ ). In contrast to the experimental group, the blank group only contained cell-culture medium, and the control group contained cell suspension and cell-culture medium but without  $\text{SiO}_2$  treatment. Before terminating the culture, 20  $\mu\text{l}$  MTT (5 mg/ml; Sigma-Aldrich; Merck KGaA) was added to each well and incubated at  $37^\circ\text{C}$  for 4 h. Subsequently, the culture medium was aspirated and 200  $\mu\text{l}$  DMSO (Amresco, LLC) was added to each well to dissolve the formazan crystals. Absorbance was measured at a wavelength of 490 nm using a Multiskan GO (Thermo Fisher Scientific, Inc.). Each group was assessed using six replicates.

Table SI. Survival rate of NR8383 cells treated with different concentrations of silica suspension.

| Group                        | n | Survival rate (%) |
|------------------------------|---|-------------------|
| 5 $\mu\text{g}/\text{cm}^2$  | 6 | 93.5 $\pm$ 24.9   |
| 10 $\mu\text{g}/\text{cm}^2$ | 6 | 92.7 $\pm$ 12.1   |
| 20 $\mu\text{g}/\text{cm}^2$ | 6 | 90.3 $\pm$ 15.2   |
| 40 $\mu\text{g}/\text{cm}^2$ | 6 | 87.9 $\pm$ 12.4   |
| 80 $\mu\text{g}/\text{cm}^2$ | 6 | 62.7 $\pm$ 14.3   |
